# Supplementary material for: Genetic Characterization and Evolution of Porcine Deltacoronavirus Isolated in the Republic of Korea in 2022
Source: MDPI journal article supplement (doi:10.3390/pathogens12050686), 2023-05-07
Supplement: s1 [file s1]

**Table S1. Primer sets for the complete genome sequencing of PDCoV in this study.**

| Target      | Primer      | Sequence (5'–3')              | Amplified length |
|-------------|-------------|-------------------------------|------------------|
| Spike       | Spike-1-Fwd | TTGACACCAACCTATTCTCCTTT       | 2323 bp          |
|             | Spike-1-Rev | CATTTTCTCAGCATCAACAACACC      |                  |
|             | Spike-2-Fwd | GCAAGTTCAAGCAGAGCAAGTTAT      | 1769 bp          |
|             | Spike-2-Rev | GCAATAATATATTGTCCAGGGATG      |                  |
| Full-length | 1F-Fwd      | ACATGGGGACTAAAGATAAAAATTATAGC | 2087 bp          |
|             | 1F-Rev      | CTAAGTACTTCGTCGCTGCTG         |                  |
|             | 2F-Fwd      | CCATTGATCTACCTGAAGACTATC      | 2622bp           |
|             | 2F-Rev      | GCAGACTAACTACAGCTGGTAAC       |                  |
|             | 3F-Fwd      | GATTATCTGGACATTTTGGATCTTTGG   | 2618bp           |
|             | 3F-Rev      | ATGTGAATACCAGATACAGTGCC       |                  |
|             | 4F-Fwd      | AGACGGTCTCATACTTAACATTTATG    | 2554bp           |
|             | 4F-Rev      | CATAACCATATTGAAACCACTGCAT     |                  |
|             | 5F-Fwd      | GTTCTTCCAATTCTTGTTTATGGCT     | 2618bp           |
|             | 5F-Rev      | CACACTGCTTAGTAACAAAGTACAAT    |                  |
|             | 6F-Fwd      | CCTGTTTCCTTCGCCCTTGACT        | 2596 bp          |
|             | 6F-Rev      | CCAGAATGCGAGAGACATCTG         |                  |
|             | 7F-Fwd      | GTTTCCGAGACATTTTGTGTTTACCAA   | 2557bp           |
|             | 7F-Rev      | GTGTTAGGTTTTATGGCGTGTG        |                  |
|             | 8F-Fwd      | GCTTTGACCTGGCATGATTGTG        | 2549bp           |
|             | 8F-Rev      | GTGTAGGAATGATAATTAGGGATGT     |                  |
|             | 9F-Fwd      | CAAAGTATTCACCTGTGTCAATTGAC    | 2597bp           |
|             | 9F-Rev      | GATGGTCGAGTATTCTGTAATGTG      |                  |
|             | 10F-Fwd     | GAAACCCCTTCTCAACTGATTG        | 2540bp           |
|             | 10F-Rev     | CGAATTGAGTCATACCAGTACTT       |                  |
|             | 11F-Fwd     | CTGCTCCAACCCCTCACCC           | 2281bp           |
|             | 11F-ReV     | TTTTTTTTTTTGCTCCATCCCCCTATAAG |                  |

Abbreviations: PDCoV, porcine deltacoronavirus; F, fragment; Fwd, forward; Rev, reverse; bp, base pair
