# Supplementary material for: Genetic Characterization and Evolution of Porcine Deltacoronavirus Isolated in the Republic of Korea in 2022
Source: MDPI journal article supplement (doi:10.3390/pathogens12050686), 2023-05-07
Supplement: s1 [file s1]

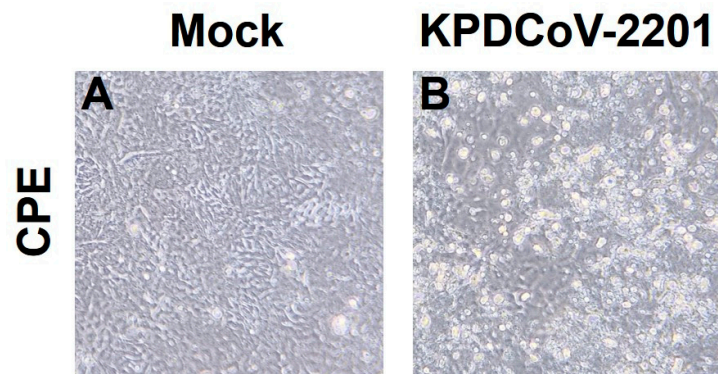

**Figure S1. KPDCoV-2201 strain causes cytopathic changes in ST cells.** (A) Morphology of Mock-infected ST cells. (B) Morphology of ST cells after 48 h of infection with KPDCoV-2201, showing cell rounding.
